# Supplementary material for: Duplex and hairpin dimer structures for perylene diimide–oligonucleotide conjugates
Source: Royal Society of Chemistry journal article supplement (doi:10.1039/b509754a), 2005-01-01
Supplement: b509754a.pdf [file b509754a.pdf]

**Supplementary Information for:**

**Duplex and hairpin dimer structures for perylene diimide-oligonucleotide conjugates**

Yan Zheng, Hai Long, George C. Schatz and Frederick D. Lewis

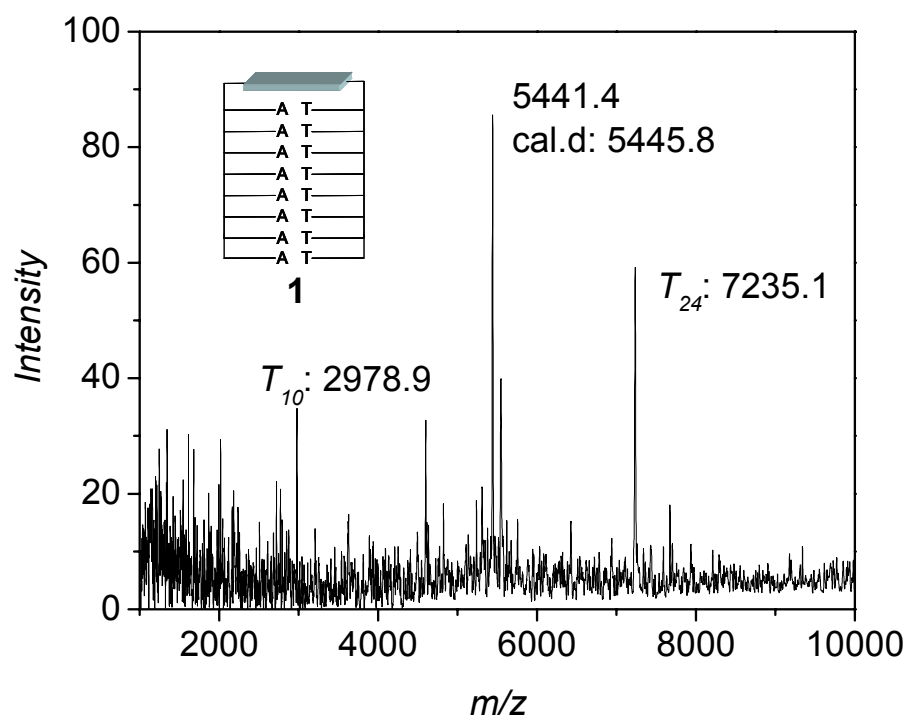

Figure S1. MALDI-TOF mass spectrum for conjugates **3**.  $T_{10}$  and  $T_{24}$  are polyT strands added to the conjugates as internal mass calibration standards.  $m/z$  3618 peak is doubly ionized  $T_{24}$ .

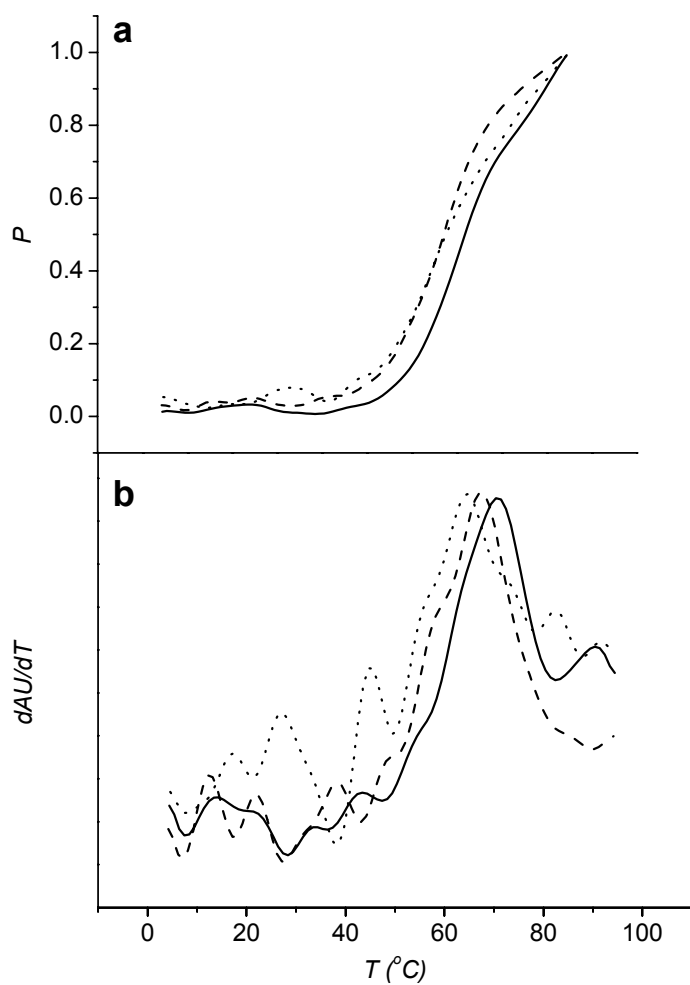

Figure S2. Melting profiles (a) and derivatives (b) of duplex **1:2** at various concentrations. Solid line: 1.5  $\mu\text{M}$ , dot line: 0.4  $\mu\text{M}$ . Buffer contains 10 mM phosphate, pH 7.4, 100 mM NaCl.

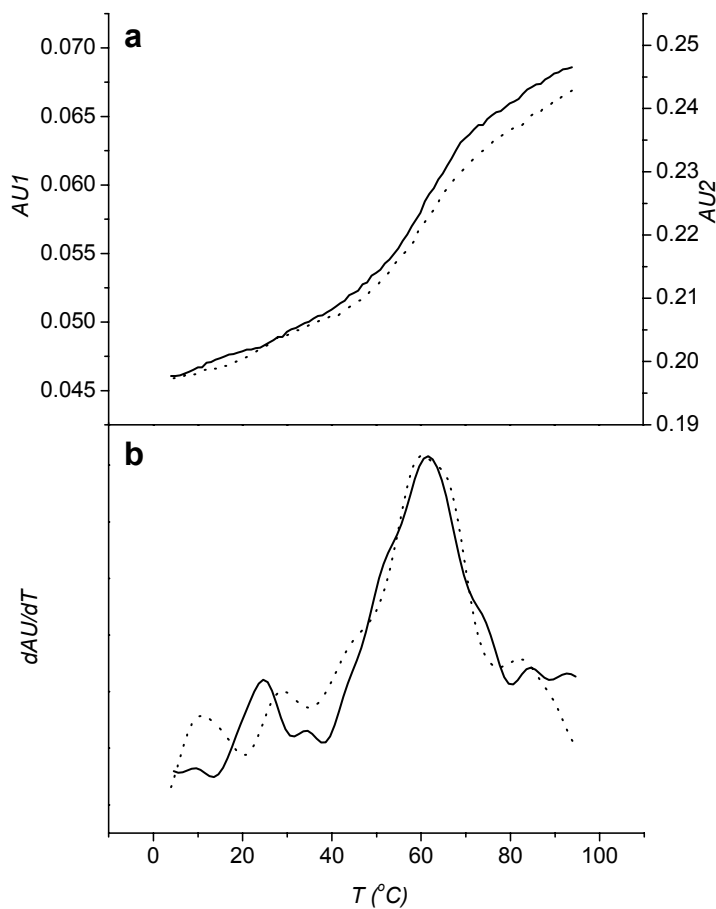

Figure S3. Melting profiles (a) and derivatives (b) of hairpin dimer **3:3** at various concentrations. Solid line: 1.8  $\mu\text{M}$ , dash line: 1.0  $\mu\text{M}$ , dot line: 0.6  $\mu\text{M}$ . Buffer contains 10 mM phosphate, pH 7.4, 100 mM NaCl.

Table S1. Concentration dependent melting temperatures.

|            | Concentration ( $\mu\text{M}$ ) | $T_m$ ( $^{\circ}\text{C}$ ) |
|------------|---------------------------------|------------------------------|
| <b>3:3</b> | 0.4                             | 60.4                         |
|            | 1.5                             | 61.5                         |
| <b>1:2</b> | 0.6                             | 64.5                         |
|            | 1.0                             | 67.5                         |
|            | 1.8                             | 70.8                         |
